# Supplementary material for: The use of health-related quality of life (HRQOL) in children and adolescents as an outcome criterion to evaluate family oriented support for young carers in Germany: an integrative review of the literature
Source: Springer Nature journal article supplement (doi:10.1186/1471-2458-8-414), 2008-12-01
Supplement: Additional file 1 [file 1471-2458-8-414-s1.doc]

Table 4: Young Carer's problems covered by instrument items

| **Young Carers prolems** | **CHQ-Items** | **KIDSCREEN-Items** | **KINDLR-Items** | **PedsQL-Items** |
| --- | --- | --- | --- | --- |
| **Having no one to talk to** | *-* „I feel lonely“[[1]](#footnote-2)1 | 2.6 „Have you felt lonely?“ 1  3.5 „have you been able to talk to your parents when you wanted to?“  4.3 „have you and your friends helped each other?“ | 2.3 „I felt alone“1 | *[no match]* |
| **Living in secrecy** | - „I lied/cheated“[[2]](#footnote-3)2  - „I feel lonely“1,2 | 2.6 „Have you felt lonely?“1,2  4.4 „have you been able to rely on your friends?“2 | 2.3 „I felt alone“1,2 | *[no match]* |
| **Lack of freetime** | *[no match]* | 3.1 „have you had enough time for yourself?“ 1  4.1 „have you spent time with your friends?“ 1 | 2.2 “I was bored” 2  5.1 „I played with my friends“1 | 3.4 „I cannot do things that other kids my age can do“1 |
| **Social isolation** | - „I had a hard time getting along with others“  - „I feel lonely“1 | 2.6 „Have you felt lonely?“ 1  4.1 „have you spent time with your friends?“ 1 | 2.3 „I felt alone“1  5.1 „I played with my friends“1  5.4 „I felt different from other children“ | 3.1 „I have trouble getting along with other kids“  3.2 „Other kids do not want to be my friend“  3.4 „I cannot do things that other kids my age can do“1 |
| **Decreasing school performance** | „I had a hard time paying attention“  „I did not do what my teacher or parent asked me to do“ | 5.2 „have you got on well at school?“  5.3 „have you been able to pay attention?“  5.4 „have you got along well with your teachers?“ | 6.1 „doing my schoolwork was easy“  6.4 „I worried about bad marks or grades“ | 4.1 „Its hard to pay attention in class“  4.2. „I forget things“1  4.3 „I have trouble keeping up with my schoolwork“  4.5 „I miss school to go to the doctor or hospital“ |
| **Parental attachment** | „In general, how would you rate your family's ability to get along with one another?“ | 3.1 „have you had enough time for yourself?“1  3.2 „have you been able to do the things you want to do in your free time?“  3.4 „have your parents treated you fairly?“ | 4.2 „I felt fine at home“  4.4 „my parents stopped me from doing certain things“ | *[no match]* |
| **Loneliness, sadness, fear, and shame** | „How much of the time do you: feel sad; feel like crying; feel afraid or scared; worry about things; feel lonely[[3]](#footnote-4)1; feel unhappy; feel nervous; feel bothered or upset; feel happy; feel cheerful“ | 2.1 „has your life been enjoyable?“  2.2 „have you been in a good mood?“  2.4 „have you felt sad?“  2.5 „have you felt so bad that you didn’t want to do anything?“ 1  2.6 „Have you felt lonely?“ 1 | 2.3 „I felt alone“1  2.4 „I felt scared“  3.3 „I felt pleased with myself“ | 2.1 „I feel afraid or scared“  2.2 „I feel sad or blue“  2.3 „I feel angry“  2.5. „I worry about what will happen to me“ |
| **Physical and mental**  **exhaustion** | *[no match]* | 1.2 „have you felt fit and well?“  1.5 „have you felt full of energy?“  2.5 „have you felt so bad that you didn’t want to do anything?“ 1 | 1.1 „I felt ill“  1.3 „I was tired and worn-out“  1.4 „I felt strong and full of energy“ | 1.8 „I have low energy“  4.2 „I forget things“1,[[4]](#footnote-5)2 |

1. 1 refers to more than one problem [↑](#footnote-ref-2)
2. 2 addresses problem allusively [↑](#footnote-ref-3)
3. 1 refers to more than one problem [↑](#footnote-ref-4)
4. 2 addresses problem allusively [↑](#footnote-ref-5)
